# Supplementary material for: RCAN1.4 mediates high glucose-induced matrix production by stimulating mitochondrial fission in mesangial cells
Source: Oxford University Press journal article supplement (doi:10.1042/bsr20192759), 2020-01-01
Supplement: bsr-2019-2759_supp.pdf [file bsr-2019-2759_supp.pdf]

**A**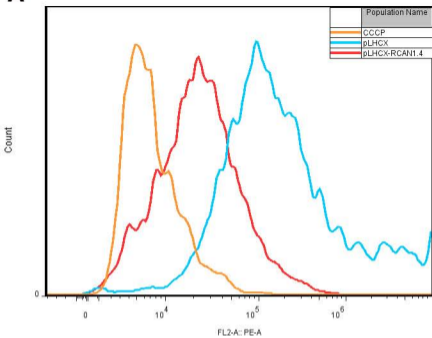**C**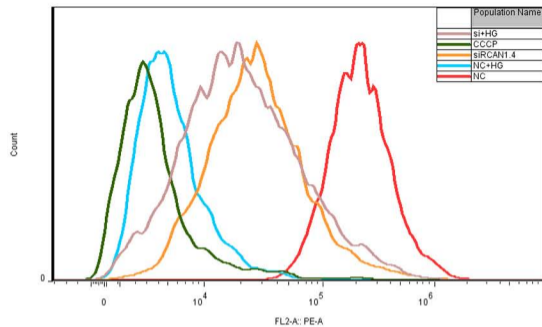**B**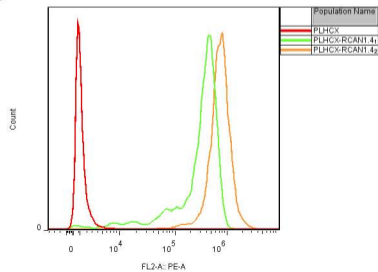**D**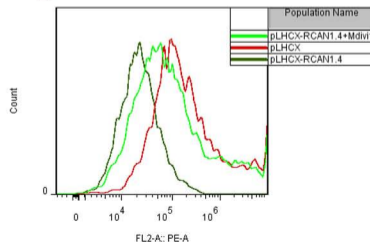**E**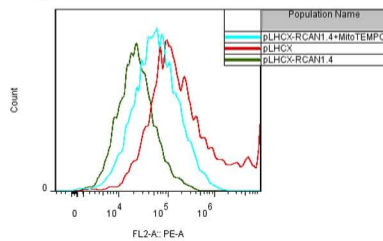

## Supplementary Figure Legends

**Fig.1 Flow cytometry analysis of mitochondrial membrane potential ( $\Delta\Psi_m$ ) and mitochondrial reactive oxygen species (mtROS).** Representative graphs of fluorescence intensity (TMRM: excitation/emission 543/580 nm, MitoSOX Red: excitation/emission 510/590 nm) were shown. A: MCs was transfected by pLHCX-RCAN1.4 or empty vector,  $\Delta\Psi_m$  was evaluated by TMRM staining with CCCP as positive control. B: MCs was transfected by pLHCX-RCAN1.4 for 24h (1) or 48 h (2), and then mtROS was evaluated by MitoSOX Red staining. C: After negative control (NC) or RCAN1.4 siRNA transfection for 36 h, MCs were incubated with HG for 24 h.  $\Delta\Psi_m$  was evaluated by TMRM staining with CCCP as positive control. D, E: MCs were pretreated with Mdivi-1 or MitoTEMPO, followed by transfection with pLHCX-RCAN1.4 or empty vector for 24 h.  $\Delta\Psi_m$  was evaluated by TMRM staining.
